# Supplementary material for: Does Responsiveness to Basic Tastes Influence Preadolescents’ Food Liking? Investigating Taste Responsiveness Segment on Bitter-Sour-Sweet and Salty-Umami Model Food Samples
Source: Nutrients. 2021 Aug 7;13(8):2721. doi: 10.3390/nu13082721 (PMC8401806; doi:10.3390/nu13082721)
Supplement: Supplementary file 1 [file nutrients-13-02721-s001.zip]

Archive with 4 entries (4 files):
- S1 Supplementary Table 1.pdf
- S2 Supplementary Table 2.pdf
- S3 Supplementary Table 3.pdf
- S4 Supplementary Table 4.pdf
