# Supplementary material for: Does Responsiveness to Basic Tastes Influence Preadolescents’ Food Liking? Investigating Taste Responsiveness Segment on Bitter-Sour-Sweet and Salty-Umami Model Food Samples
Source: Nutrients. 2021 Aug 7;13(8):2721. doi: 10.3390/nu13082721 (PMC8401806; doi:10.3390/nu13082721)
Supplement: Supplementary file 1 [file nutrients-13-02721-s001.zip › S1 Supplementary Table 1.pdf]

**Supplementary Table 1.** Selected food items for familiarity and stated liking. The food item presented in a randomized order across subjects.

| No | Food items        |
|----|-------------------|
| 1  | Apple             |
| 2  | Clementine        |
| 3  | Pineapple         |
| 4  | Watermelon        |
| 5  | Strawberries      |
| 6  | Grapes            |
| 7  | Grapefruits       |
| 8  | Raspberries       |
| 9  | Kiwi              |
| 10 | Orange            |
| 11 | Rucola            |
| 12 | Spinach           |
| 13 | Lettuce           |
| 14 | Broccoli          |
| 15 | Green beans       |
| 16 | Squash            |
| 17 | Peas              |
| 18 | Tomato            |
| 19 | Corn              |
| 20 | Carrots           |
| 21 | Orange juice      |
| 22 | Grapefruit juice  |
| 23 | Milk chocolate    |
| 24 | Dark chocolate    |
| 25 | Vanilla ice cream |
| 26 | Fruit yogurt      |
| 27 | Plain yogurt      |
| 28 | Strawberry sorbet |
