# Supplementary material for: Does Responsiveness to Basic Tastes Influence Preadolescents’ Food Liking? Investigating Taste Responsiveness Segment on Bitter-Sour-Sweet and Salty-Umami Model Food Samples
Source: Nutrients. 2021 Aug 7;13(8):2721. doi: 10.3390/nu13082721 (PMC8401806; doi:10.3390/nu13082721)
Supplement: Supplementary file 1 [file nutrients-13-02721-s001.zip › S2 Supplementary Table 2.pdf]

**Supplementary Table 2.** Selected food items for food choice preference. Pairs were presented in a randomized order across subjects. (L) and (R) indicate a left or right position of the item in the questionnaire.

| Pair No. | Category  | Taste  | Low taste intensity food | High taste intensity food |
|----------|-----------|--------|--------------------------|---------------------------|
| 1        | Fruit     | Sour   | Apple (L)                | Orange (R)                |
| 2        | Fruit     | Sour   | Watermelon (R)           | Orange (L)                |
| 3        | Fruit     | Sour   | Pineapple (R)            | Grapefruit (L)            |
| 4        | Fruit     | Sour   | Grapes (L)               | Kiwi (R)                  |
| 5        | Fruit     | Sour   | Clementine (L)           | Kiwi (R)                  |
| 6        | Fruit     | Sour   | Strawberries (L)         | Raspberries (R)           |
| 7        | Vegetable | Bitter | Lettuce (L)              | Rucola (R)                |
| 8        | Vegetable | Bitter | Lettuce (R)              | Spinach (L)               |
| 9        | Vegetable | Bitter | Spinach (R)              | Rucola (L)                |
| 10       | Vegetable | Bitter | Corn (R)                 | Green beans (L)           |
| 11       | Vegetable | Bitter | Carrots (L)              | Squash (R)                |
| 12       | Vegetable | Bitter | Tomato (R)               | Squash (L)                |
| 13       | Vegetable | Bitter | Green beans (R)          | Broccoli (L)              |
| 14       | Vegetable | Bitter | Carrots (L)              | Green beans (R)           |
| 15       | Vegetable | Bitter | Peas (R)                 | Green beans (L)           |
| 16       | Juice     | Sour   | Apple juice (R)          | Grapefruit juice (L)      |
| 17       | Dessert   | Bitter | Milk chocolate (L)       | Dark chocolate (R)        |
| 18       | Dessert   | Sour   | Vanilla ice cream (L)    | Lemon sorbet (R)          |
| 19       | Dessert   | Sour   | Fruit yogurt (R)         | Plain yogurt (L)          |
