# Supplementary material for: Does Responsiveness to Basic Tastes Influence Preadolescents’ Food Liking? Investigating Taste Responsiveness Segment on Bitter-Sour-Sweet and Salty-Umami Model Food Samples
Source: Nutrients. 2021 Aug 7;13(8):2721. doi: 10.3390/nu13082721 (PMC8401806; doi:10.3390/nu13082721)
Supplement: Supplementary file 1 [file nutrients-13-02721-s001.zip › S3 Supplementary Table 3.pdf]

**Supplementary Table 3:** Statistical results (Cochran's Q test) from a sensory characterization of vegetables with Check-All-That-Apply (CATA) in Italian preadolescent children (n=121)

| Attributes | p-values         | Lettuce   | Rucola    |
|------------|------------------|-----------|-----------|
| Sour       | <b>0.020</b>     | 0.038 (a) | 0.124(b)  |
| Delicate   | <b>0.006</b>     | 0.343 (b) | 0.190 (a) |
| Sweet      | <b>0.008</b>     | 0.219 (b) | 0.086 (a) |
| Bitter     | <b>&lt;0.001</b> | 0.105 (a) | 0.381 (b) |

| Attributes | p-values         | Spinach   | Lettuce   |
|------------|------------------|-----------|-----------|
| Sour       | <b>0.033</b>     | 0.034 (a) | 0.101 (b) |
| Delicate   | <b>&lt;0.001</b> | 0.311 (b) | 0.050 (a) |
| Sweet      | 0.106            | 0.218 (a) | 0.143 (a) |
| Bitter     | <b>0.047</b>     | 0.176 (b) | 0.101 (a) |

| Attributes | p-values         | Rucola    | Spinach   |
|------------|------------------|-----------|-----------|
| Sour       | 0.819            | 0.124 (a) | 0.114 (a) |
| Delicate   | <b>0.002</b>     | 0.190 (b) | 0.048 (a) |
| Sweet      | 0.108            | 0.086 (a) | 0.152 (a) |
| Bitter     | <b>&lt;0.001</b> | 0.381 (b) | 0.152 (a) |

| Attributes | p-values         | Green beans | Corn      |
|------------|------------------|-------------|-----------|
| Sour       | 0.206            | 0.025 (a)   | 0.058 (a) |
| Delicate   | <b>&lt;0.001</b> | 0.042 (a)   | 0.333 (b) |
| Sweet      | <b>&lt;0.001</b> | 0.208 (a)   | 0.417 (b) |
| Bitter     | 0.564            | 0.067 (a)   | 0.050 (a) |

| Attributes | p-values         | Carrots   | Squash    |
|------------|------------------|-----------|-----------|
| Sour       | 0.132            | 0.034 (a) | 0.076 (a) |
| Delicate   | <b>&lt;0.001</b> | 0.568 (b) | 0.203 (a) |
| Sweet      | <b>0.002</b>     | 0.356 (b) | 0.178 (a) |
| Bitter     | <b>0.007</b>     | 0.034 (a) | 0.136 (b) |

| Attributes | p-values         | Squash    | Tomato    |
|------------|------------------|-----------|-----------|
| Sour       | 0.071            | 0.076 (a) | 0.136 (a) |
| Delicate   | <b>&lt;0.001</b> | 0.203 (b) | 0.059 (a) |
| Sweet      | <b>0.001</b>     | 0.178 (a) | 0.356 (b) |
| Bitter     | <b>0.003</b>     | 0.136 (b) | 0.025 (a) |

| Attributes | p-values     | Broccoli  | Green beans |
|------------|--------------|-----------|-------------|
| Sour       | 0.132        | 0.066 (a) | 0.025 (a)   |
| Delicate   | <b>0.018</b> | 0.124 (b) | 0.041 (a)   |
| Sweet      | 0.178        | 0.149 (a) | 0.207 (a)   |
| Bitter     | <b>0.001</b> | 0.190 (b) | 0.066 (a)   |

| Attributes | p-values         | Carrots   | Green beans |
|------------|------------------|-----------|-------------|
| Sour       | 0.705            | 0.033 (a) | 0.025 (a)   |
| Delicate   | <b>&lt;0.001</b> | 0.554 (b) | 0.041 (a)   |
| Sweet      | <b>0.013</b>     | 0.347 (b) | 0.207 (a)   |
| Bitter     | 0.206            | 0.033 (a) | 0.066 (a)   |

| Attributes | p-values     | Green beans | Peas      |
|------------|--------------|-------------|-----------|
| Sour       | 0.705        | 0.025 (a)   | 0.033 (a) |
| Delicate   | 1.000        | 0.042 (a)   | 0.042 (a) |
| Sweet      | <b>0.009</b> | 0.208 (a)   | 0.317 (b) |
| Bitter     | 0.564        | 0.067 (a)   | 0.050 (a) |

Note: different letters indicate a significant difference by Sheskin method, values in bold show a significant difference at  $p < 0.05$
