# Supplementary material for: Does Responsiveness to Basic Tastes Influence Preadolescents’ Food Liking? Investigating Taste Responsiveness Segment on Bitter-Sour-Sweet and Salty-Umami Model Food Samples
Source: Nutrients. 2021 Aug 7;13(8):2721. doi: 10.3390/nu13082721 (PMC8401806; doi:10.3390/nu13082721)
Supplement: Supplementary file 1 [file nutrients-13-02721-s001.zip › S4 Supplementary Table 4.pdf]

**Supplementary Table 4:** Norwegian version of the Italian Child Food Neophobia Scale (ICFNS) [64].  
(R) indicates the neophilic items for which the score was reversed.

|                                                                                                  |                                |                                                   |                               |                                      |
|--------------------------------------------------------------------------------------------------|--------------------------------|---------------------------------------------------|-------------------------------|--------------------------------------|
| <b>1. Jeg spiser ofte ny og uvant mat (R)</b>                                                    |                                |                                                   |                               |                                      |
| <input type="checkbox"/> veldig usant                                                            | <input type="checkbox"/> usant | <input type="checkbox"/> hverken sant eller usant | <input type="checkbox"/> sant | <input type="checkbox"/> veldig sant |
| <b>2. Jeg stoler ikke på ny mat</b>                                                              |                                |                                                   |                               |                                      |
| <input type="checkbox"/> veldig usant                                                            | <input type="checkbox"/> usant | <input type="checkbox"/> hverken sant eller usant | <input type="checkbox"/> sant | <input type="checkbox"/> veldig sant |
| <b>3. Hvis maten er ny for meg, smaker jeg ikke på den.</b>                                      |                                |                                                   |                               |                                      |
| <input type="checkbox"/> veldig usant                                                            | <input type="checkbox"/> usant | <input type="checkbox"/> hverken sant eller usant | <input type="checkbox"/> sant | <input type="checkbox"/> veldig sant |
| <b>4. Jeg liker å prøve rare smaker og matvarer som er uvanlige og kommer fra ulike land (R)</b> |                                |                                                   |                               |                                      |
| <input type="checkbox"/> veldig usant                                                            | <input type="checkbox"/> usant | <input type="checkbox"/> hverken sant eller usant | <input type="checkbox"/> sant | <input type="checkbox"/> veldig sant |
| <b>5. Når jeg spiser middag hos en venn, liker jeg å smake ny mat (R)</b>                        |                                |                                                   |                               |                                      |
| <input type="checkbox"/> veldig usant                                                            | <input type="checkbox"/> usant | <input type="checkbox"/> hverken sant eller usant | <input type="checkbox"/> sant | <input type="checkbox"/> veldig sant |
| <b>6. Jeg er redd for å smake på mat jeg ikke har prøvd før</b>                                  |                                |                                                   |                               |                                      |
| <input type="checkbox"/> veldig usant                                                            | <input type="checkbox"/> usant | <input type="checkbox"/> hverken sant eller usant | <input type="checkbox"/> sant | <input type="checkbox"/> veldig sant |
| <b>7. Jeg er veldig kresen angående mat.</b>                                                     |                                |                                                   |                               |                                      |
| <input type="checkbox"/> veldig usant                                                            | <input type="checkbox"/> usant | <input type="checkbox"/> hverken sant eller usant | <input type="checkbox"/> sant | <input type="checkbox"/> veldig sant |
| <b>8. Jeg spiser hva som helst! (R)</b>                                                          |                                |                                                   |                               |                                      |
| <input type="checkbox"/> veldig usant                                                            | <input type="checkbox"/> usant | <input type="checkbox"/> hverken sant eller usant | <input type="checkbox"/> sant | <input type="checkbox"/> veldig sant |
